# Supplementary material for: eHealth and telemedicine: Practices and beliefs among healthcare professionals and medical students at a medical university
Source: PLoS One. 2019 Feb 28;14(2):e0213067. doi: 10.1371/journal.pone.0213067 (PMC6394957; doi:10.1371/journal.pone.0213067)
Supplement: S1 File — (PDF) [file pone.0213067.s001.pdf]

## Fragebogen Medcampus (Deutsch)

| Allgemeine Informationen                                                           |  |  |  |   |              |
|------------------------------------------------------------------------------------|--|--|--|---|--------------|
| Sind Sie Angestellte/r oder StudentIn?                                             |  |  |  |   |              |
| Angestellte/r                                                                      |  |  |  |   |              |
| StudentIn                                                                          |  |  |  |   |              |
| Was ist ihr Geschlecht?                                                            |  |  |  |   |              |
| Mann                                                                               |  |  |  |   |              |
| Frau                                                                               |  |  |  |   |              |
| Was ist Ihre höchste abgeschlossene Ausbildung?                                    |  |  |  |   |              |
| Primär (Pflichtschule, Lehre, Fachschule ohne Matura)                              |  |  |  |   |              |
| Sekundär (Matura)                                                                  |  |  |  |   |              |
| Tertiär (FH, Universität)                                                          |  |  |  |   |              |
| Wo befindet sich Ihr Hauptwohnsitz?                                                |  |  |  |   |              |
| Wien                                                                               |  |  |  |   |              |
| Niederösterreich                                                                   |  |  |  |   |              |
| Anderes                                                                            |  |  |  |   |              |
| Wie alt sind Sie?                                                                  |  |  |  |   |              |
| ___ __ Jahre                                                                       |  |  |  |   |              |
| Spezifische Informationen                                                          |  |  |  |   |              |
|                                                                                    |  |  |  |   | 0=nein, 1=ja |
| Haben Sie schon einmal online folgende gesundheitsrelevante Informationen gesucht? |  |  |  |   |              |
| Finden, Vergleichen, Bewerten von ÄrztInnen/medizinischen Einrichtungen            |  |  |  | 0 | 1            |
| Terminvereinbarung bei ÄrztInnen/medizinischen Einrichtungen                       |  |  |  | 0 | 1            |
| Bedeutung eines bestimmten medizinischen Begriffes                                 |  |  |  | 0 | 1            |
| Krankheiten, Symptome und Therapiemöglichkeiten                                    |  |  |  | 0 | 1            |
| Nikotinersatztherapie, Raucherentwöhnungstherapie                                  |  |  |  | 0 | 1            |

|                                                                                                                                                                                                                      |                                                   |   |   |   |   |
|----------------------------------------------------------------------------------------------------------------------------------------------------------------------------------------------------------------------|---------------------------------------------------|---|---|---|---|
| Kalorienzähler, Ernährungstagebücher                                                                                                                                                                                 | 0                                                 | 1 |   |   |   |
| Impfungen, Screeningprogramme (z.B. Brustkrebsvorsorgeuntersuchung)                                                                                                                                                  | 0                                                 | 1 |   |   |   |
| Wirkung eines rezeptpflichtigen oder rezeptfreien Medikamentes                                                                                                                                                       | 0                                                 | 1 |   |   |   |
| Nebenwirkung eines rezeptpflichtigen oder rezeptfreien Medikaments                                                                                                                                                   | 0                                                 | 1 |   |   |   |
| Gedächtnistraining                                                                                                                                                                                                   | 0                                                 | 1 |   |   |   |
| Anleitungen zu Fitnessübungen                                                                                                                                                                                        | 0                                                 | 1 |   |   |   |
|                                                                                                                                                                                                                      | 1=volle Zustimmung<br>bis 5=sehr wenig Zustimmung |   |   |   |   |
| Wie gut fühlen Sie sich über das Thema eHealth informiert?                                                                                                                                                           | 1                                                 | 2 | 3 | 4 | 5 |
| Wie gut fühlen Sie sich über das Thema Telemedizin informiert?                                                                                                                                                       | 1                                                 | 2 | 3 | 4 | 5 |
| Wie schätzen Sie die Zuverlässigkeit von Informationen im Internet über gesundheitsrelevante Themen (z.B. Symptome, Krankheiten und Therapiemöglichkeiten) ein?                                                      | 1                                                 | 2 | 3 | 4 | 5 |
| Wie sinnvoll finden Sie den elektronischen Austausch von gesundheitsbezogenen Informationen oder Gesundheitsdaten zwischen ÄrztInnen und PatientInnen?                                                               | 1                                                 | 2 | 3 | 4 | 5 |
| Wie sinnvoll finden Sie eine Erfassung Ihrer Gesundheitsdaten oder Ihres Gesundheitsverhaltens durch tragbare Sensoren und Smartphone-Apps zur Überwachung einer chronischen Erkrankung oder Befindlichkeitsstörung? | 1                                                 | 2 | 3 | 4 | 5 |
|                                                                                                                                                                                                                      | 1                                                 | 2 | 3 | 4 | 5 |
|                                                                                                                                                                                                                      | 1                                                 | 2 | 3 | 4 | 5 |
| Wie sinnvoll finden Sie eine Erfassung Ihrer Gesundheitsdaten durch tragbare Sensoren und die daraus abgeleiteten Empfehlungen für einen gesunden Lebensstil?                                                        | 1                                                 | 2 | 3 | 4 | 5 |
| Wie bewerten Sie folgende Aussagen?                                                                                                                                                                                  |                                                   |   |   |   |   |
| Bei elektronischer Sammlung von Gesundheitsdaten ist für ausreichenden Datenschutz gesorgt.                                                                                                                          | 1                                                 | 2 | 3 | 4 | 5 |
| Die erweiterte PatientInnenbetreuung durch die Sammlung von Gesundheitsdaten mittels Apps und Computerprogrammen verbessert die ganzheitliche Sicht auf die PatientInnen.                                            | 1                                                 | 2 | 3 | 4 | 5 |
| Durch Informationen aus dem Internet sind PatientInnen besser informiert.                                                                                                                                            | 1                                                 | 2 | 3 | 4 | 5 |
| Telemedizinische Anwendungen bereichern die Beziehung zwischen ÄrztInnen                                                                                                                                             | 1                                                 | 2 | 3 | 4 | 5 |

|                                                                                     |   |   |   |   |   |
|-------------------------------------------------------------------------------------|---|---|---|---|---|
| und PatientInnen.                                                                   |   |   |   |   |   |
| Telemedizin bietet einen ortsunabhängigen Zugang zu Gesundheitsleistungen.          | 1 | 2 | 3 | 4 | 5 |
| Telemedizin reduziert die Kosten der Gesundheitsversorgung.                         | 1 | 2 | 3 | 4 | 5 |
| Telemedizin reduziert den bürokratischen Aufwand der Gesundheitsversorgung.         | 1 | 2 | 3 | 4 | 5 |
| Telemedizin verringert unnötige Mehrfachdiagnostik.                                 | 1 | 2 | 3 | 4 | 5 |
| Telemedizin erhöht die Qualität der PatientInnenversorgung.                         | 1 | 2 | 3 | 4 | 5 |
| Telemedizin verbessert die Beziehung zwischen ÄrztInnen und PatientInnen.           | 1 | 2 | 3 | 4 | 5 |
| Telemedizin erleichtert die ärztliche Tätigkeit.                                    | 1 | 2 | 3 | 4 | 5 |
| Offene Frage                                                                        |   |   |   |   |   |
| Gibt es etwas, was Sie uns zu eHealth und Telemedizin noch sagen wollen? (Freitext) |   |   |   |   |   |

## Questionnaire Medcampus (English)

|                                                                                                    |  |  |  |  |              |
|----------------------------------------------------------------------------------------------------|--|--|--|--|--------------|
| <b>Socio-demographic information</b>                                                               |  |  |  |  |              |
| Are you employee or student?                                                                       |  |  |  |  |              |
| Employee                                                                                           |  |  |  |  |              |
| Student                                                                                            |  |  |  |  |              |
| What is your gender?                                                                               |  |  |  |  |              |
| Male                                                                                               |  |  |  |  |              |
| Female                                                                                             |  |  |  |  |              |
| What is your highest education?                                                                    |  |  |  |  |              |
| Primary (compulsory school, apprenticeship, technical school without secondary school certificate) |  |  |  |  |              |
| Sekundär (secondary school certificate)                                                            |  |  |  |  |              |
| Tertiär (FH, Universität)                                                                          |  |  |  |  |              |
| Where do you live?                                                                                 |  |  |  |  |              |
| Vienna                                                                                             |  |  |  |  |              |
| Lower Austria                                                                                      |  |  |  |  |              |
| Other                                                                                              |  |  |  |  |              |
| How old are you?                                                                                   |  |  |  |  |              |
| ___ __ years                                                                                       |  |  |  |  |              |
| <b>Specific information</b>                                                                        |  |  |  |  |              |
| Have you ever searched the internet for the following health information?                          |  |  |  |  | 0 =no, 1=yes |
| Finding, comparing, assessing a healthcare service                                                 |  |  |  |  | 0   1        |
| Making a doctor's appointment                                                                      |  |  |  |  | 0   1        |
| Meaning of a specific medical term                                                                 |  |  |  |  | 0   1        |
| Specific diseases, symptoms, therapeutic options                                                   |  |  |  |  | 0   1        |
| Smoking cessation, nicotine replacement therapy                                                    |  |  |  |  | 0   1        |
| Calorie intake, nutrition diary                                                                    |  |  |  |  | 0   1        |

|                                                                                                                                                         |                                           |   |   |   |   |
|---------------------------------------------------------------------------------------------------------------------------------------------------------|-------------------------------------------|---|---|---|---|
| Vaccinations, screening programs                                                                                                                        | 0                                         | 1 |   |   |   |
| Effect of prescription or nonprescription medicines                                                                                                     | 0                                         | 1 |   |   |   |
| Side effect of prescription or nonprescription medicines                                                                                                | 0                                         | 1 |   |   |   |
| Mnemonic training                                                                                                                                       | 0                                         | 1 |   |   |   |
| Fitness instructions                                                                                                                                    | 0                                         | 1 |   |   |   |
|                                                                                                                                                         | 1=high approval to<br>5=very low approval |   |   |   |   |
| How well informed do you feel about eHealth?                                                                                                            | 1                                         | 2 | 3 | 4 | 5 |
| How well informed do you feel about telemedicine?                                                                                                       | 1                                         | 2 | 3 | 4 | 5 |
| How reliable is health information from the Internet?                                                                                                   | 1                                         | 2 | 3 | 4 | 5 |
| How reasonable is electronic health information exchange between healthcare professionals and patients?                                                 | 1                                         | 2 | 3 | 4 | 5 |
| How useful is the collection of health data or health behavior through portable sensors and smartphone apps to monitor a chronic illness or disability? | 1                                         | 2 | 3 | 4 | 5 |
| How useful is the collection of health data through portable sensors and recommendations for a healthy lifestyle derived from them?                     | 1                                         | 2 | 3 | 4 | 5 |
| How do you rate the following statements?                                                                                                               |                                           |   |   |   |   |
| Data security and privacy are guaranteed for electronically collected health data.                                                                      | 1                                         | 2 | 3 | 4 | 5 |
| Collecting health data via telemonitoring improves the holistic view of the patients.                                                                   | 1                                         | 2 | 3 | 4 | 5 |
| Online health information improves patient knowledge.                                                                                                   | 1                                         | 2 | 3 | 4 | 5 |
| Telemedicine improves interaction between physicians and patients.                                                                                      | 1                                         | 2 | 3 | 4 | 5 |
| Telemedicine offers location-independent health services.                                                                                               | 1                                         | 2 | 3 | 4 | 5 |
| Telemedicine reduces healthcare costs.                                                                                                                  | 1                                         | 2 | 3 | 4 | 5 |
| Telemedicine reduces healthcare administration.                                                                                                         | 1                                         | 2 | 3 | 4 | 5 |
| Telemedicine reduces multiple diagnoses.                                                                                                                | 1                                         | 2 | 3 | 4 | 5 |
| Telemedicine enhances quality of healthcare.                                                                                                            | 1                                         | 2 | 3 | 4 | 5 |
| Telemedicine enhances doctor-patient relationship.                                                                                                      | 1                                         | 2 | 3 | 4 | 5 |
| Telemedicine facilitates medical care.                                                                                                                  | 1                                         | 2 | 3 | 4 | 5 |

|                                                                                        |  |
|----------------------------------------------------------------------------------------|--|
| Open question                                                                          |  |
| Is there anything else you want to tell us about eHealth and telemedicine? (Free text) |  |
